# Supplementary material
Source: MDPI journal article supplement (https://www.mdpi.com/2073-4441/15/7/1287)
Supplement: s1 [file s1]

## Climate Change Impact on Dug-Well based livelihood in Soan River Basin

### Questionnaire to develop Inventory & Database of Dug-Wells

#### 1. Investigator Information:

|                  |                 |                                  |
|------------------|-----------------|----------------------------------|
| Name:            |                 |                                  |
| Designation:     |                 |                                  |
| Age:             | Sex: M/F        | Date of the Survey: (D/M/Y)      |
| Survey Phase No: | Survey Site No: | <b><u>Water Sample Code:</u></b> |

#### 2. Survey Location:

|                 |                |              |
|-----------------|----------------|--------------|
| Village Name:   | Ward No/U.C No | U.C Name:    |
| Tehsil Name:    | District Name: |              |
| GPS Coordinate: | Latitude: E    | Longitude: N |
| Address:        |                |              |
| Contact No:     |                |              |

#### 3. Respondent Profile:

(Encircle Code Accordingly)

| Question # | Description                                               | Option                     | Code |
|------------|-----------------------------------------------------------|----------------------------|------|
| Q 1        | Name Of the Respondent:                                   |                            |      |
| Q 2        | Age Of the Respondent: (Years)                            |                            |      |
| Q 3        | What is the Sex of Respondent:                            | Male                       | 1    |
|            |                                                           | Female                     | 2    |
| Q 4        | What is the Marital Status:<br>(if code 1, then skip Q 5) | Single                     | 1    |
|            |                                                           | Married                    | 2    |
|            |                                                           | Widow                      | 3    |
|            |                                                           | Divorced                   | 4    |
| Q 5        | If Married, then specify the Number of Children:          | 1    2    3    4    5    6 |      |
| Q 6        | Relationship with the Head of Household:                  | Self                       | 1    |
|            |                                                           | Spouse                     | 2    |
|            |                                                           | Parent                     | 3    |
|            |                                                           | Son/Daughter               | 4    |
|            |                                                           | Brother                    | 5    |
|            |                                                           | Other (specify)            |      |

|      |                                         |                            |   |
|------|-----------------------------------------|----------------------------|---|
| Q 7  | What is the type of Family:             | Nuclear                    | 1 |
|      |                                         | Joint                      | 2 |
| Q 8  | Qualification Of the Respondent:        | Illiterate/Un-lettered     | 1 |
|      |                                         | Primary                    | 2 |
|      |                                         | Middle                     | 3 |
|      |                                         | Matriculation              | 4 |
|      |                                         | Intermediate               | 5 |
|      |                                         | Graduation                 | 6 |
|      |                                         | Master                     | 7 |
|      |                                         | Other (specify)            |   |
| Q 9  | Occupation Of the Respondent:           |                            |   |
| Q 10 | What is the primary source of Income:   | Agriculture                | 1 |
|      |                                         | Non-agriculture            | 2 |
|      |                                         | Both                       | 3 |
| Q 11 | What is the total number of dependents? | 1    2    3    4    5    6 |   |

#### 4. Dug-Well Related Information:

(Encircle Code Accordingly)

| Question # | Description                                                                                                             | Option                  | Code |
|------------|-------------------------------------------------------------------------------------------------------------------------|-------------------------|------|
| Q          | What is the type of Dug-Well:<br>(If Code 1, then only select section 5)<br>(If Code 2, then select both section 5 & 6) | Traditional Dug-Well    | 1    |
|            |                                                                                                                         | Hybrid (Bore-hole Well) | 2    |
|            |                                                                                                                         | Both                    | 3    |
|            |                                                                                                                         | Other (specify)         |      |

#### 5. Traditional Dug-Well:

(Encircle Code Accordingly)

| Question # | Description                                                          | Option                    | Code |
|------------|----------------------------------------------------------------------|---------------------------|------|
| Q 1        | How many Dug-wells are there in your land?                           | One                       | 1    |
|            |                                                                      | Two                       | 2    |
|            |                                                                      | More (Specify)            |      |
| Q 2        | Construction type of Traditional Dug-Well:                           | Kuchha (Mud made)         | 1    |
|            |                                                                      | Pucca (bricks/Stone)      | 2    |
| Q 3        | How many year ago, this dug-well was constructed:<br>(Years)         |                           |      |
| Q 4        | What is the current status of Dug-Well:<br>(If code 1, then skip Q5) | Operational               | 1    |
|            |                                                                      | Non-Operational           | 2    |
| Q 5        | If not operational, then mention the reason:                         | Non availability of water | 1    |

|      |                                                                                               |                                |   |
|------|-----------------------------------------------------------------------------------------------|--------------------------------|---|
|      |                                                                                               | Lack of facility to pull water | 2 |
|      |                                                                                               | Maintenance required           | 3 |
|      |                                                                                               | Other (specify)                |   |
| Q 6  | Diameter Of the Dug-Well: (ft)<br>(Inner / Outer)                                             |                                |   |
| Q 7  | Total Constructed Depth of the Well from the surface of the soil: (ft)                        |                                |   |
| Q 8  | Existing/current (DW) depth to water surface from the top of well at the time of survey: (ft) |                                |   |
| Q 9  | Minimum (DW <sub>min</sub> ) depth to water surface from the top of well: (ft)                |                                |   |
| Q 10 | Maximum (DW <sub>min</sub> ) depth to water surface from the top of well: (ft)                |                                |   |
| Q 11 | For which purpose this well water is being utilized:                                          | Irrigation                     | 1 |
|      |                                                                                               | Drinking                       | 2 |
|      |                                                                                               | Both                           | 3 |
| Q 12 | What is the quality of available water for Drinking Purposes?                                 | Very Good                      | 1 |
|      |                                                                                               | Good                           | 2 |
|      |                                                                                               | Fair                           | 3 |
|      |                                                                                               | Poor                           | 4 |
|      |                                                                                               | Very Poor                      | 5 |
| Q 13 | What is the quality of available water for Irrigation Purposes?                               | Very Good                      | 1 |
|      |                                                                                               | Good                           | 2 |
|      |                                                                                               | Fair                           | 3 |
|      |                                                                                               | Poor                           | 4 |
|      |                                                                                               | Very Poor                      | 5 |
| Q 14 | What is/are other source(s) of Drinking Water:                                                | Bore well                      | 1 |
|      |                                                                                               | Spring                         | 2 |
|      |                                                                                               | No other                       | 3 |
|      |                                                                                               | Other (specify)                |   |
| Q 15 | What is/are other source(s) of Irrigation Water:                                              | Bore-well                      | 1 |
|      |                                                                                               | Ponds/mini-dam                 | 2 |
|      |                                                                                               | River water                    | 3 |
|      |                                                                                               | No other                       | 4 |

## 6. Hybrid (Bore-Hole) Wells:

(Encircle Code Accordingly)

| Question # | Description                                                           | Option                         | Code |
|------------|-----------------------------------------------------------------------|--------------------------------|------|
| Q 1        | Bore well exist inside or outside the well:                           | Inside                         | 1    |
|            |                                                                       | Outside                        | 2    |
| Q 2        | No of bores inside a Well.                                            |                                |      |
| Q 3        | How many year ago, this bore was made: (Years)                        |                                |      |
| Q 4        | What is the current status of bore well:<br>(If code 1, then skip Q4) | Operational                    | 1    |
|            |                                                                       | Non-Operational                | 2    |
| Q 5        | If not operational, then mention the reason:                          | Non availability of water      | 1    |
|            |                                                                       | Lack of facility to pull water | 2    |
|            |                                                                       | Maintenance required           | 3    |
|            |                                                                       | Other (specify)                |      |
| Q 6        | Diameter Of the bore casing: (inch)                                   |                                |      |
| Q 7        | Diameter Of the outlet/delivery pipe: (inch)                          |                                |      |
| Q 8        | Depth Of bore of well: (ft)                                           |                                |      |
| Q 9        | Water table existence at the time of bore: (ft)                       |                                |      |
| Q 10       | For which purpose this bore-well water is being utilized:             | Irrigation                     | 1    |
|            |                                                                       | Drinking                       | 2    |
|            |                                                                       | Both                           | 3    |

## 7. Water Lifting system for dug-Well:

(Encircle Code Accordingly)

|   |                                                                                                                                                                                                                                    |                                  |   |
|---|------------------------------------------------------------------------------------------------------------------------------------------------------------------------------------------------------------------------------------|----------------------------------|---|
| Q | What is the type of water lifting system used at dug-well to pump water?<br>(If code 1, then select section 8)<br>(If code 2, then select section 9)<br>(If code 3, then select section 10)<br>(If code 4, then select section 11) | Traditional Persian Wheel system | 1 |
|   |                                                                                                                                                                                                                                    | Electric operated pump           | 2 |
|   |                                                                                                                                                                                                                                    | Diesel operated pump             | 3 |
|   |                                                                                                                                                                                                                                    | Solar operated pump              | 4 |
|   |                                                                                                                                                                                                                                    | Pulley system                    | 5 |
|   |                                                                                                                                                                                                                                    | Other (specify)                  |   |

## 8. Traditional Persian Wheel water up-lifting System:

(Encircle Code Accordingly)

|     |                                                                                              |                         |   |
|-----|----------------------------------------------------------------------------------------------|-------------------------|---|
| Q 1 | What is the material used for Persian Wheel?                                                 | Wood                    | 1 |
|     |                                                                                              | Metal                   | 2 |
| Q 2 | Total no of Persian Wheel on dug-Well:                                                       | One                     | 1 |
|     |                                                                                              | Two                     | 2 |
| Q 3 | What is the current state of Machinery/Persian Wheel:<br>(If code 1, then skip Q 4)          | Functional              | 1 |
|     |                                                                                              | Non-Functional          | 2 |
| Q 4 | If not functional, then mention the reason:                                                  | Old fashioned           | 1 |
|     |                                                                                              | Need to repair          | 2 |
|     |                                                                                              | Not efficient           | 3 |
|     |                                                                                              | Not enough water        | 4 |
|     |                                                                                              | Other (specify)         |   |
| Q 5 | How do you operate this Persian Wheel system to lift water from the well?                    | Manually                | 1 |
|     |                                                                                              | Through Donkeys         | 2 |
|     |                                                                                              | Trough Bullocks         | 3 |
|     |                                                                                              | Both (option 2 & 3)     | 4 |
|     |                                                                                              | Other (specify)         |   |
| Q 6 | How many bullocks/donkeys are required to operate this Dug-Well system?                      | One                     | 1 |
|     |                                                                                              | Two                     | 2 |
|     |                                                                                              | (If more, then specify) |   |
| Q 7 | For how long you have been using Persian Wheel to meet your Irrigation needs? (Years before) |                         |   |
| Q 8 | Does this irrigation system meet your requirement?                                           | Yes                     | 1 |
|     |                                                                                              | No                      | 2 |

|      |                                                                                                                                                                                                                                                                             |                               |                               |
|------|-----------------------------------------------------------------------------------------------------------------------------------------------------------------------------------------------------------------------------------------------------------------------------|-------------------------------|-------------------------------|
| Q 9  | What is the efficiency of this traditional Persian Wheel Irrigation System?<br>a) Four code 1, <b>better (1)</b><br>b) Three code 1, <b>Normal (2)</b><br>c) Two code 1, <b>poor (3)</b><br>d) One code 1, <b>very poor (4)</b><br>e) No code 1, <b>Non-operational (5)</b> | Proper alignment              | 1                             |
|      |                                                                                                                                                                                                                                                                             | Not proper alignment          | 2                             |
|      |                                                                                                                                                                                                                                                                             | Bearings exist                | 1                             |
|      |                                                                                                                                                                                                                                                                             | Bearings not exist            | 2                             |
|      |                                                                                                                                                                                                                                                                             | Proper Catch cans             | 1                             |
|      |                                                                                                                                                                                                                                                                             | Broken Catch cans             | 2                             |
|      |                                                                                                                                                                                                                                                                             | Wheel lock exist              | 1                             |
|      |                                                                                                                                                                                                                                                                             | Wheel lock not exit           | 2                             |
| Q 10 | From how much depth (from top) can water be lifted using Persian Wheel? (ft)                                                                                                                                                                                                |                               |                               |
| Q 11 | What is the average discharge of water per rotation from well with Persian Wheel? (liters)                                                                                                                                                                                  | Size of catch cans (lit)      |                               |
|      |                                                                                                                                                                                                                                                                             | No. of Catch cans             |                               |
| Q 12 | How much time is required to empty this well during irrigation? (Discharge rate in hrs)                                                                                                                                                                                     |                               |                               |
| Q 13 | How many hours do you operate this system daily?                                                                                                                                                                                                                            | 1                             | 2      3      4      5      6 |
| Q 14 | How much level of water goes down after pumping water for above said hours in a day? (ft)                                                                                                                                                                                   |                               |                               |
| Q 15 | How much time is required for filling again at same level in the well after irrigation? (Current Recharge rate in hrs)                                                                                                                                                      |                               |                               |
| Q 16 | Do you observe the increase in the recharge rate during rainy season?                                                                                                                                                                                                       | Yes                           | 1                             |
|      |                                                                                                                                                                                                                                                                             | No                            | 2                             |
| Q 17 | Do you feel that, now recharge rate has changed than the past few years:                                                                                                                                                                                                    | Increase                      | 1                             |
|      |                                                                                                                                                                                                                                                                             | Decrease                      | 2                             |
|      |                                                                                                                                                                                                                                                                             | No change                     | 3                             |
| Q 18 | Is there any operational cost for this system?<br>(if code 2, then skip Q 19)                                                                                                                                                                                               | Yes                           | 1                             |
|      |                                                                                                                                                                                                                                                                             | No                            | 2                             |
| Q 19 | If yes, mention the detail against each possible option: (Rs/-)                                                                                                                                                                                                             | Animal capital cost           |                               |
|      |                                                                                                                                                                                                                                                                             | Food expenses of animal/month |                               |
|      |                                                                                                                                                                                                                                                                             | Shelter cost/month            |                               |
|      |                                                                                                                                                                                                                                                                             | Machinery maintenance         |                               |

|      |                                                                                    |                         |   |
|------|------------------------------------------------------------------------------------|-------------------------|---|
|      |                                                                                    | (If more, then specify) |   |
| Q 20 | Is this system helping you sustain your livelihood?<br>(if Yes, Explain in detail) | Yes                     | 1 |
|      |                                                                                    | No                      | 2 |
| Q 21 | How can we help you in improving your system?                                      |                         |   |
| Q 22 | Do you feel embarrassment by using animals to derive Persian Wheel:                | Yes                     | 1 |
|      |                                                                                    | No                      | 2 |

### 9. Electric operated pump for water uplifting from Dug-Well:

(Encircle Code Accordingly)

|     |                                                                                     |                       |   |
|-----|-------------------------------------------------------------------------------------|-----------------------|---|
| Q 1 | What is the current status of electric operated pump:<br>(if code 1, then skip Q 2) | Functional            | 1 |
|     |                                                                                     | Non-Functional        | 2 |
| Q 2 | If not functional, then mention the reason:                                         | Old fashioned         | 1 |
|     |                                                                                     | Need to repair        | 2 |
|     |                                                                                     | Not efficient         | 3 |
|     |                                                                                     | High operational cost | 4 |
|     |                                                                                     | Other (specify)       |   |
| Q 3 | What is the pump power:<br>a) Hp<br>b) KW                                           |                       |   |
| Q 4 | What is the discharge of pump:<br>a) LPS<br>b) GPM                                  |                       |   |
| Q 5 | What is the outlet pipe size/delivery size: (inch)                                  |                       |   |
| Q 6 | Is this pumping system fulfill your irrigation & drinking requirement:              | Yes                   | 1 |
|     |                                                                                     | No                    | 2 |
| Q 7 | Is this system considered expensive to pull water from well:                        | Yes                   | 1 |
|     |                                                                                     | No                    | 2 |
| Q 8 | What is the operational cost of the system: (Rs/month)                              |                       |   |
| Q 9 | Do you need less expensive option for this activity:                                | Yes                   | 1 |
|     |                                                                                     | No                    | 2 |

**10. Diesel operated pump for water uplifting from Dug-Well:****(Encircle Code Accordingly)**

|     |                                                                                   |                       |   |
|-----|-----------------------------------------------------------------------------------|-----------------------|---|
| Q 1 | What is the current status of diesel operated pump:<br>(if code 1, then skip Q 2) | Functional            | 1 |
|     |                                                                                   | Non-Functional        | 2 |
| Q 2 | If not functional, then mention the reason:                                       | Old fashioned         | 1 |
|     |                                                                                   | Need to repair        | 2 |
|     |                                                                                   | Not efficient         | 3 |
|     |                                                                                   | High operational cost | 4 |
|     |                                                                                   | Other (specify)       |   |
| Q 3 | What is the pump power:<br>c) Hp<br>d) KW                                         |                       |   |
| Q 4 | What is the discharge of pump:<br>c) LPS<br>d) GPM                                |                       |   |
| Q 5 | What is the outlet pipe size/delivery size: (inch)                                |                       |   |
| Q 6 | Is this pumping system fulfill your irrigation & drinking requirement:            | Yes                   | 1 |
|     |                                                                                   | No                    | 2 |
| Q 7 | Is this system expensive to pull water from well:                                 | Yes                   | 1 |
|     |                                                                                   | No                    | 2 |
| Q 8 | What is the operational cost of the system: (Rs/month)                            |                       |   |
| Q 9 | Do you need less expensive option for this activity:                              | Yes                   | 1 |
|     |                                                                                   | No                    | 2 |

**11. Solar operated pump for water uplifting from Dug-Well:****(Encircle Code Accordingly)**

|     |                                                                                  |                            |   |
|-----|----------------------------------------------------------------------------------|----------------------------|---|
| Q 1 | What is the current status of solar operated pump:<br>(if code 1, then skip Q 2) | Functional                 | 1 |
|     |                                                                                  | Non-Functional             | 2 |
| Q 2 | If not functional, then mention the reason:                                      | Need to repair             | 1 |
|     |                                                                                  | Not efficient              | 2 |
|     |                                                                                  | High operational cost      | 3 |
|     |                                                                                  | Less power to operate pump | 4 |
|     |                                                                                  | Other (specify)            |   |
| Q 3 | What is the pump power:<br>e) Hp<br>f) KW                                        |                            |   |
| Q 4 | What is the discharge of pump:<br>e) LPS<br>f) GPM                               |                            |   |



|     |                                                                        |     |   |
|-----|------------------------------------------------------------------------|-----|---|
| Q 5 | What is the total power of solar panels:<br>a) Hp<br>b) KW             |     |   |
| Q 6 | What is the outlet pipe size/delivery size: (inch)                     |     |   |
| Q 7 | Is this pumping system fulfill your irrigation & drinking requirement: | Yes | 1 |
|     |                                                                        | No  | 2 |
| Q 8 | Is this system expensive to pull water from well:                      | Yes | 1 |
|     |                                                                        | No  | 2 |
| Q 9 | What is the operational cost of the system: (Rs/month)                 |     |   |

## 12. Agri. Land Holding & Agricultural activities:

(Encircle Code Accordingly)

|     |                                                                                                              |                                    |   |
|-----|--------------------------------------------------------------------------------------------------------------|------------------------------------|---|
| Q 1 | What is your household's status in agricultural landholding?<br>(if code 1, then skip Q 2 & select Q 3)      | Landowner                          | 1 |
|     |                                                                                                              | Borrower/Tenants/Lease             | 2 |
| Q 2 | For how long you have been a tenant?                                                                         | 1-2 years                          | 1 |
|     |                                                                                                              | 2-5 years                          | 2 |
|     |                                                                                                              | More than 5 years                  | 3 |
| Q 3 | What is the size of your owned agricultural land?<br>a) Acres<br>b) Hectare<br>c) Kanals                     |                                    |   |
| Q 4 | What is the status of your land piece?                                                                       | Exit whole land side by side       | 1 |
|     |                                                                                                              | Exit in segregated portion/patches | 2 |
| Q 5 | What is the size of your Dug-Well dependent land?<br>a) Acres<br>b) Hectare<br>c) Kanals                     |                                    |   |
| Q 6 | What is the size of agricultural land which is available for farming?<br>d) Acres<br>e) Hectare<br>f) Kanals |                                    |   |
| Q 7 | Have you leased out some land?<br>(If code 2, then skip Q 8)                                                 | Yes                                | 1 |
|     |                                                                                                              | No                                 | 2 |
| Q 8 | If yes, then how much of your land leased out?<br>a) Acres<br>b) Hectare<br>c) Kanals                        |                                    |   |
| Q 9 | How much land can be irrigated by your system?<br>a) Acres                                                   |                                    |   |

|      |                                                                                                               |                                  |   |
|------|---------------------------------------------------------------------------------------------------------------|----------------------------------|---|
|      | b) Hectare<br>c) Kanals                                                                                       |                                  |   |
| Q 10 | Have you left some land fallow?<br>(if code 2, then skip Q 11,12)                                             | Yes                              | 1 |
|      |                                                                                                               | No                               | 2 |
| Q 11 | If yes, how much of your land left fallow:<br>d) Acres<br>e) Hectare<br>f) Kanals                             |                                  |   |
| Q 12 | What is the reason to leave your land fallow:                                                                 | Not enough water for irrigation  | 1 |
|      |                                                                                                               | Non fertile land/soil conditions | 2 |
|      |                                                                                                               | Uncultivable due to slop         | 3 |
|      |                                                                                                               | Labor shortage                   | 4 |
|      |                                                                                                               | Other (specify)                  |   |
| Q 13 | What types of agricultural practices are being performed?                                                     | Traditional/Conventional         | 1 |
|      |                                                                                                               | High-Value/Advanced              | 2 |
| Q 14 | Mention the type of crops grown by the farmer normally:<br>Kharif Crops:(Apr-Oct)<br><br>Rabi Crops:(Nov-Apr) |                                  |   |
| Q 15 | Have you leveled the land for irrigation:                                                                     | Yes                              | 1 |
|      |                                                                                                               | No                               | 2 |

### 13. Perception about Climate Change/ Weather Variability:

(Encircle Code Accordingly)

| Question # | Description                                       | Option               | Code |
|------------|---------------------------------------------------|----------------------|------|
| Q 1        | Do you agree that climate change is taking place? | Yes                  | 1    |
|            |                                                   | No                   | 2    |
| Q 2        | If yes, how did you come to realize?              | Personal observation | 1    |
|            |                                                   | Awareness campaigns  | 2    |
|            |                                                   | Media                | 3    |
|            |                                                   | Other                | 4    |
| Q 3        | Which sector is most affected by Climate Change?  | Agriculture          | 1    |
|            |                                                   | Water Management     | 2    |
|            |                                                   | Human Health         | 3    |

|      |                                                                                                                                                                                |                            |   |
|------|--------------------------------------------------------------------------------------------------------------------------------------------------------------------------------|----------------------------|---|
| Q 4  | Is your dug-well dependent livelihood being affected by climate change?                                                                                                        | Yes                        | 1 |
|      |                                                                                                                                                                                | No                         | 2 |
| Q 5  | Temperature patterns have changed compared to 10 years ago?                                                                                                                    | Yes                        | 1 |
|      |                                                                                                                                                                                | No                         | 2 |
| Q 6  | What is the current scenario of summer as compared to 10 years ago?                                                                                                            | More hot                   | 1 |
|      |                                                                                                                                                                                | Less hot                   | 2 |
|      |                                                                                                                                                                                | No change                  | 3 |
| Q 7  | What is the current scenario of winter as compared to 10 years ago?                                                                                                            | More cold                  | 1 |
|      |                                                                                                                                                                                | Less cold                  | 2 |
|      |                                                                                                                                                                                | No change                  | 3 |
| Q 8  | What is the current scenario of average rainfall as compared to 10 years ago?                                                                                                  | Increased                  | 1 |
|      |                                                                                                                                                                                | Decreased                  | 2 |
|      |                                                                                                                                                                                | No change                  | 3 |
| Q 9  | What is the current water availability in the dug well for crops and animals than 10 years ago?                                                                                | Increased                  | 1 |
|      |                                                                                                                                                                                | Decreased                  | 2 |
|      |                                                                                                                                                                                | No change                  | 3 |
| Q 10 | What is the current water availability in the nearby river or stream than 10 years ago?                                                                                        | Increased                  | 1 |
|      |                                                                                                                                                                                | Decreased                  | 2 |
|      |                                                                                                                                                                                | No change                  | 3 |
| Q 11 | Crop growing seasons are changing over the years?                                                                                                                              | Yes                        | 1 |
|      |                                                                                                                                                                                | No                         | 2 |
| Q 12 | What is the current crop productivity than 10 years ago?                                                                                                                       | Increased due to CC        | 1 |
|      |                                                                                                                                                                                | Decreased due to CC        | 2 |
|      |                                                                                                                                                                                | No change due to CC        | 3 |
| Q 13 | How Climate Change is affecting your cultivation practices?                                                                                                                    | Affecting yield            | 1 |
|      |                                                                                                                                                                                | Affecting quality of crops | 2 |
|      |                                                                                                                                                                                | Decreasing water supply    | 3 |
|      |                                                                                                                                                                                | Increasing water supply    | 4 |
|      |                                                                                                                                                                                | Others                     | 5 |
| Q 14 | Do you think that climate smart technology interventions in your area can prevent you from being a severe victim to climate change related problems?                           | Yes                        | 1 |
|      |                                                                                                                                                                                | No                         | 2 |
| Q 15 | Have you noticed any change in quality of water obtained from your dug well in the face of changing climate?<br>(If code 1, then select Q 16)<br>(If code 2, then select Q 17) | Yes (+ve) Change           | 1 |
|      |                                                                                                                                                                                | Yes (-ve) Change           | 2 |
|      |                                                                                                                                                                                | No Change                  | 3 |
| Q 16 | If yes (+ve) Change, then choose from one of the available options.                                                                                                            | Suitable for agriculture   | 1 |
|      |                                                                                                                                                                                | Suitable for drinking      | 2 |

|      |                                                                                                               |                                                           |             |
|------|---------------------------------------------------------------------------------------------------------------|-----------------------------------------------------------|-------------|
|      |                                                                                                               | Both                                                      | 3           |
| Q 17 | If yes (-ve) Change, then choose from one of the available options.                                           | Not Suit for agriculture<br>Not Suit for drinking<br>Both | 1<br>2<br>3 |
| Q 18 | Have you noticed any change in quantity of water obtained from your dug well in the face of changing climate? | Yes (+ve) Change<br>Yes (-ve) Change<br>No Change         | 1<br>2<br>3 |
| Q 19 | Is the climate change effected your dug well's productivity?                                                  | Yes (+ve) Change<br>Yes (-ve) Change<br>No Change         | 1<br>2<br>3 |

#### 14. House hold income:

(Encircle Code Accordingly)

|     |                                                                                   |                                                                                             |                  |
|-----|-----------------------------------------------------------------------------------|---------------------------------------------------------------------------------------------|------------------|
| Q 1 | Mention the primary source and associated income of household? (Rs/month)         | Agriculture<br>Non-Agriculture<br>Livestock<br>Fisheries<br>House-hold consumption<br>Other |                  |
| Q 2 | What is the total income? (PKR)<br>a) Annual<br>b) Monthly<br>c) Seasonal         |                                                                                             |                  |
| Q 3 | Was there an increase or decrease in the income from (SOURCE) in last five years? | Increase<br>Decrease<br>Fluctuating<br>No change                                            | 1<br>2<br>3<br>4 |
| Q 4 | Is your income directly related/depends upon dug well's productivity?             | Yes<br>No                                                                                   | 1<br>2           |

#### 15. Adaptive Strategies by the farmer:

(Encircle Code Accordingly)

|     |                                                                                                                             |   |
|-----|-----------------------------------------------------------------------------------------------------------------------------|---|
| Q 1 | What are your most critical challenges faced by using this traditional Animal Driven Persian Wheel Dug-Well for Irrigation: |   |
|     | • Quality Of Water of this Dug-Well                                                                                         | 1 |
|     | • Yield of Water (less water to irrigate whole land)                                                                        | 2 |
|     | • Cost/expenditure of pumping water from well                                                                               | 3 |
|     | • Reluctance to use animal driven Persian Wheel on Dug-Well                                                                 | 4 |
|     | • Water fluctuation                                                                                                         | 5 |
|     | • Low Recharge rate                                                                                                         | 6 |

|     |                                                                    |     |   |
|-----|--------------------------------------------------------------------|-----|---|
|     | <ul style="list-style-type: none"> <li>Other (specify)</li> </ul>  |     |   |
| Q 2 | Are you using some adaptive measures to overcome these challenges? | Yes | 1 |
|     |                                                                    | No  | 2 |
| Q 3 | How many Dug-wells in your village:                                |     |   |
| Q 4 | How many Dug-wells in your UC:                                     |     |   |
| Q 5 | If Yes; then how are you adapting to these challenges?             |     |   |

**The above mention all sections are completely filled.**

\_\_\_\_\_  
**Signature of investigator**

\_\_\_\_\_  
**Signature of Superintend**

|                                                                                                                             |                                                                                           |  |
|-----------------------------------------------------------------------------------------------------------------------------|-------------------------------------------------------------------------------------------|--|
| <b>NOTE:</b><br><br><b>Special remarks for future correspondence and other studies. (not mandatory for all respondents)</b> | 1. Influential Person for future correspondence if required (like FGDs for any study etc) |  |
|                                                                                                                             | 2. Well knowledge & up to date for issues/solution etc                                    |  |
|                                                                                                                             | 3. Good communicator and respondent                                                       |  |
|                                                                                                                             | 4. High co-operation level during interview                                               |  |
|                                                                                                                             | 5. Best fit for monitoring his well as according to the theme of this study               |  |

**---GOOD LUCK---**
